# Supplementary material
Source: ML conference proceedings conference paper supplement (https://proceedings.neurips.cc/paper_files/paper/2016/hash/0a113ef6b61820daa5611c870ed8d5ee-Abstract.html)
Supplement: Supplementary file [file 0a113ef6b61820daa5611c870ed8d5ee-Supplemental.zip]

## A Preliminary

In this section, we present several important theorems and lemmas in our analysis.

The following concentration inequalities are well known.

**Lemma 16.** *Let  $x_i$  be zero-mean sub-Gaussian distribution with variance proxy  $\sigma^2$ . Denote  $S_n = \sum_{i=1}^n a_i x_i$  for a fixed sequence  $\{a_i\}$ . Then*

$$\Pr(|S_n| > t) \leq 2 \exp\left(-\frac{t^2}{2\sigma^2(\sum_{i=1}^n a_i^2)}\right).$$

That is, with a probability at least  $1 - \eta$ ,

$$|S_n| \leq \sigma \sqrt{\sum_{i=1}^n a_i^2} \sqrt{2 \log(2/\eta)}.$$

**Corollary 17.** *Let  $x_i \sim \mathcal{N}(0, 1)$  be a standard Gaussian distribution. Then with a probability at least  $1 - \eta$ ,*

$$\sum_{i=1}^n a_i(x_i^2 - 1) \leq 2 \sqrt{\sum_{i=1}^n a_i^2} \sqrt{2 \log(2/\eta)}.$$

For random matrix, we have matrix concentration inequalities [Tropp, 2015].

**Theorem 18** (Matrix Bernstein's Inequality [Tropp, 2015]). *Suppose  $\{S_i\}_{i=1}^n$  are set of independent random matrices of dimension  $d_1 \times d_2$ ,*

$$\|S_i - ES_i\| \leq L.$$

Define

$$Z = \sum_{i=1}^n S_i, \quad \sigma^2 = \frac{1}{n} \max(E\|(Z - EZ)(Z - EZ)^\top\|_2, E\|(Z - EZ)^\top(Z - EZ)\|_2).$$

The with a probability at least  $1 - \delta$ , for any  $0 < \epsilon < 1$ ,

$$\frac{1}{n} \|Z - EZ\|_2 \leq 9\epsilon \sqrt{\log((d_1 + d_2)/\delta)}$$

provided

$$n \geq \max(\sigma^2, L)/\epsilon^2.$$

And for any  $n$ ,

$$\frac{1}{n} \|Z - EZ\|_2 \leq \frac{4}{3} \frac{L}{n} \log((d_1 + d_2)/\delta) + 3\sqrt{2 \frac{\sigma^2}{n} \log((d_1 + d_2)/\delta)}.$$

Using matrix Bernstein's inequality, we can bound the covariance estimator.

**Corollary 19** (Matrix Bernstein's Inequality for Covariance Estimator [Tropp, 2015]). *Suppose  $\mathbf{x}_i \in \mathbb{R}^d, i = 1, 2, \dots, n$  are independent random variables with zero mean.*

$$\|\mathbf{x}_i\|^2 \leq B, \quad A = E(\mathbf{x}_i \mathbf{x}_i^\top)$$

Then with a probability at least  $1 - \delta$ ,

$$\left\| \frac{1}{n} \sum_{i=1}^n \mathbf{x}_i \mathbf{x}_i^\top - A \right\|_2 \leq 9\epsilon \sqrt{\log(2d/\delta)/n}$$

provided

$$n \geq \max(B\|A\|, B)/\epsilon^2.$$

## B Proof of Lemmas

### B.1 Proof of Lemma 5

*Proof.* Denote the eigenvalue decomposition of  $M$  as

$$M = U \Lambda U^\top = U \text{diag}(\lambda_1, \lambda_2, \dots, \lambda_k) U^\top$$

Since Gaussian distribution is rotation invariant,  $\hat{\mathbf{x}}_i = U^\top \mathbf{x}_i$  also follows standard Gaussian distribution.

$$\mathbf{x}_i^\top M \mathbf{x}_i = \mathbf{x}_i^\top U \Lambda U^\top \mathbf{x}_i = |\hat{\mathbf{x}}_i^\top \Lambda \hat{\mathbf{x}}_i| = \sum_{j=1}^k \lambda_j \hat{x}_{i,j}^2.$$

It is easy to see that  $E(\mathbf{x}_i^\top M \mathbf{x}_i) = \sum_j \lambda_j = \text{tr}(M)$ . Define

$$a_i \triangleq \mathbf{x}_i^\top M \mathbf{x}_i - \text{tr}(M) = \sum_{j=1}^d \lambda_j (\hat{x}_{i,j}^2 - 1)$$

According to Corollary 17, for a fixed  $i$ , with a probability at least  $1 - \eta$ ,

$$|a_i| \leq 2\|M\|_F \sqrt{2 \log(2/\eta)}.$$

Then for any  $i$ , with a probability at least  $1 - \eta$ ,

$$|a_i| \leq 2\|M\|_F \sqrt{2 \log(2n/\eta)}.$$

Apply Corollary 17 again, with a probability at least  $1 - 2\eta$ ,

$$\begin{aligned} \left| \frac{1}{n} \sum_{i=1}^n a_i - \text{tr}(M) \right| &\leq 2\|M\|_F \sqrt{2 \log(2n/\eta)} \sqrt{2 \log(2/\eta)/n} \\ &\leq 2\sqrt{k} \|M\|_2 \sqrt{2 \log(2n/\eta)} \sqrt{2 \log(2/\eta)/n}. \end{aligned}$$

Denote  $\delta = 2\sqrt{k} \sqrt{2 \log(2n/\eta)} \sqrt{2 \log(2/\eta)/n}$ . Then when  $n \geq Ck/\delta^2$ ,

$$\left| \frac{1}{n} \sum_{i=1}^n a_i - \text{tr}(M) \right| \leq \|M\|_2 \delta.$$

□

## B.2 Proof of Lemma 6

*Proof.* Define random variable

$$\begin{aligned} a_i &= \mathbf{x}_i^\top \mathbf{w}, \quad E a_i = 0 \\ E a_i^2 &\leq \|\mathbf{w}\|_2^2 \end{aligned}$$

Then according to Lemma 16, with a probability at least  $1 - \eta$ ,

$$\left| \frac{1}{n} \sum_{i=1}^n a_i \right| \leq \|\mathbf{w}\|_2 \sqrt{2 \log(2/\eta)/n}.$$

□

## B.3 Proof of Lemma 8

*Proof.* Define random vector

$$\mathbf{a}_i = \mathbf{x}_i \mathbf{x}_i^\top M \mathbf{x}_i, \quad E \mathbf{a}_i = 0.$$

With a probability at least  $(1 - \eta_1)(1 - \eta_2)$ ,

$$\begin{aligned} \|\mathbf{a}_i\|_2 &= \|\mathbf{x}_i \mathbf{x}_i^\top M \mathbf{x}_i\|_2 \leq \|\mathbf{x}_i^\top M \mathbf{x}_i\|_2 \|\mathbf{x}_i\|_2 \\ &\leq (|\text{tr}(M)| + 2\|M\|_F \sqrt{2 \log(2n/\eta_1)}) \sqrt{2d \log(2n/\eta_2)} \\ &\triangleq c_1 \sqrt{2d \log(2n/\eta_2)}. \end{aligned}$$

$$\begin{aligned} \|E \mathbf{a}_i^\top \mathbf{a}_i\|_2 &= \|\mathbf{x}_i^\top M \mathbf{x}_i \mathbf{x}_i^\top \mathbf{x}_i \mathbf{x}_i^\top M \mathbf{x}_i\|_2 \\ &\leq (\mathbf{x}_i^\top M \mathbf{x}_i)^2 \|\mathbf{x}_i\|_2^2 \\ &\leq 2c_1^2 d \log(2n/\eta_2). \end{aligned}$$

By matrix Bernstein's inequality, the concentration holds when

$$\begin{aligned} n &\geq \frac{1}{\epsilon^2} \max\{c_1 \sqrt{2d \log(2n/\eta_2)}, 2c_1^2 d \log(2n/\eta_2)\} \\ &= \frac{1}{\epsilon^2} O(k^2 d \|\mathbf{M}\|_2^2). \end{aligned}$$

Therefore, after taking the union bound, there exists some constant  $C_2 = O(\log(2n/\eta))$ ,

$$\left\| \frac{1}{n} \sum_{i=1}^n \mathbf{a}_i \right\|_2 \leq \epsilon$$

$$n \geq C_2 k^2 d \|M\|_2^2 \log(2(d+1)/\eta) / \epsilon^2.$$

Denote  $\delta = \|M\|_2 / \epsilon$ . Then when  $n \geq C k^2 d / \delta$ ,

$$\left\| \frac{1}{n} \sum_{i=1}^n \mathbf{a}_i \right\|_2 \leq \|M\|_2 \delta.$$

□

#### B.4 Proof of Lemma 7

$$\left\| \frac{1}{n} \mathcal{A}'(X^\top \mathbf{w}) \right\|_2 = \left\| \frac{1}{n} \sum_{i=1}^n \mathbf{x}_i \mathbf{x}_i^\top \mathbf{w} \mathbf{x}_i^\top \right\|_2.$$

$$E\{\mathbf{x}_i \mathbf{x}_i^\top \mathbf{w} \mathbf{x}_i^\top\} = 0$$

$$\begin{aligned} \|\mathbf{x}_i \mathbf{x}_i^\top \mathbf{w} \mathbf{x}_i^\top\|_2 &\leq \|\mathbf{x}_i^\top \mathbf{w}\|_2 \|\mathbf{x}_i\|_2^2 \\ &\leq 2\|\mathbf{w}\|_2 \sqrt{2 \log(2/\eta)} (d + 2\sqrt{2d \log(2n/\eta)}) \\ &\leq 4\|\mathbf{w}\|_2 \sqrt{2 \log(2/\eta)} d \end{aligned}$$

provided  $d \geq 8 \log(2n/\eta)$ . Now considering

$$\{E\mathbf{x}_i \mathbf{x}_i^\top \mathbf{w} \mathbf{x}_i^\top \mathbf{x}_i \mathbf{w}^\top \mathbf{x}_i \mathbf{x}_i^\top\}_{pq} = E\{(\sum x_p x_q w_{i1} x_{i1} w_{i2} x_{i2} x_{i3}^2)\}$$

When  $p \neq q$ ,

$$\begin{aligned} E\{(\sum x_p x_q w_{i1} x_{i1} w_{i2} x_{i2} x_{i3}^2)\} &= E\{(2 \sum_{i3} x_p x_q w_p x_p w_q x_q x_{i3}^2)\} \\ &= E\{(2 \sum_{i3} x_p^2 x_q^2 w_p w_q x_{i3}^2)\} \\ &= 2w_p w_q E\{(\sum_{i3} x_p^2 x_q^2 x_{i3}^2)\} \\ &= 2w_p w_q d \end{aligned}$$

When  $p = q$ ,

$$\begin{aligned} E\{(\sum x_p x_q w_{i1} x_{i1} w_{i2} x_{i2} x_{i3}^2)\} &= E\{(\sum x_p^2 w_{i1} x_{i1} w_{i2} x_{i2} x_{i3}^2)\} \\ &= E\{(\sum x_p^2 w_p x_p w_p x_p x_{i3}^2 + \sum x_p^2 w_j x_j w_j x_j x_{i3}^2 + \sum x_p^2 w_{i3} x_{i3} w_{i3} x_{i3} x_{i3}^2)\} \\ &= E\{(\sum_{i3 \neq p} x_p^4 w_p^2 x_{i3}^2 + \sum_{j \neq i3 \neq p} x_p^2 w_j^2 x_j^2 x_{i3}^2 + \sum_{i3 \neq p} x_p^2 w_{i3}^2 x_{i3}^4)\} \\ &= w_p^2(d-1) + \sum_{j \neq p} w_j^2(d-1) + \sum_{i3 \neq p} w_{i3}^2 \\ &= w_p^2(d-1) + \sum_{j \neq p} w_j^2 d = w_p^2(d-1) + \sum_{j=1}^d w_j^2 d - w_p^2 d \\ &= \sum_{j=1}^d w_j^2 d - w_p^2 \end{aligned}$$

Therefore,

$$\begin{aligned} E\mathbf{x}_i \mathbf{x}_i^\top \mathbf{w} \mathbf{x}_i^\top \mathbf{x}_i \mathbf{w}^\top \mathbf{x}_i \mathbf{x}_i^\top &= d \text{diag}\{\|\mathbf{w}\|_2^2\} - \text{diag}\{\mathbf{w} \circ \mathbf{w}\} + 2d\mathbf{w}\mathbf{w}^\top \\ \|E\mathbf{x}_i \mathbf{x}_i^\top \mathbf{w} \mathbf{x}_i^\top \mathbf{x}_i \mathbf{w}^\top \mathbf{x}_i \mathbf{x}_i^\top\|_2 &\leq 4d\|\mathbf{w}\|_2^2 \end{aligned}$$

Using matrix Bernstein's inequality,

$$\begin{aligned} \left\| \frac{1}{n} \sum_{i=1}^n \mathbf{x}_i \mathbf{x}_i^\top \mathbf{w} \mathbf{x}_i^\top \right\|_2 &\leq \frac{4}{3} \frac{\|\mathbf{w}\|_2 \sqrt{2 \log(2/\eta) d}}{n} \log(2d/\eta) \\ &\quad + 3 \sqrt{2 \frac{4d \|\mathbf{w}\|_2^2}{n} \log(2d/\eta)} \\ &\leq C \|\mathbf{w}\|_2 \sqrt{\frac{d}{n}} \end{aligned}$$

Denote  $\delta = C \sqrt{d/n}$ , when  $n \geq Cd/\delta^2$ ,  $d \geq 8 \log(2n/\eta)$ ,

$$\left\| \frac{1}{n} \sum_{i=1}^n \mathbf{x}_i \mathbf{x}_i^\top \mathbf{w} \mathbf{x}_i^\top \right\|_2 \leq \|\mathbf{w}\|_2 \delta$$

### B.5 Proof of Lemma 9

According to Corollary 19, when  $d \geq 8 \log(2n/\eta)$ ,

$$\|\mathbf{x}_i\|^2 \leq 2d$$

Therefore, with a probability at least  $1 - \eta$ ,

$$\left\| I - \frac{1}{n} X X^\top \right\|_2 \leq 9\epsilon \sqrt{\log(2d/\eta)/n}$$

for  $n \geq 2d/\epsilon^2$ . Denote  $\delta = 9\epsilon \sqrt{\log(2d/\eta)/n}$ , then when  $n \geq Cd/\delta^2$ ,

$$\left\| I - \frac{1}{n} X X^\top \right\|_2 \leq \delta.$$

### B.6 Proof of Lemma 11

To derive  $\alpha_{t+1}$ ,

$$\begin{aligned} \|U_\perp^{*\top} [M^* + O(2\delta\epsilon_t)] U^{(t)}\|_2 &\leq \|U_\perp^{*\top} M^* U^{(t)}\|_2 + 2\delta\epsilon_t \\ &\leq 2\delta\epsilon_t \end{aligned}$$

$$\begin{aligned} \sigma_k \{U^{*\top} [M^* + O(2\delta\epsilon_t)] U^{(t)}\} &\geq U^{*\top} M^* U^{(t)} - 2\delta\epsilon_t \\ &\geq \sigma_k^* \sigma_k \{U^{*\top} U^{(t)}\} - 2\delta\epsilon_t \\ &= \sigma_k^* \cos \theta_t - 2\delta\epsilon_t \end{aligned}$$

$$\begin{aligned} \alpha_{t+1} = \tan \theta_{t+1} &= \frac{\|U_\perp^{*\top} [M^* + O(2\delta\epsilon_t)] U^{(t)}\|_2}{\sigma_k \{U^{*\top} [M^* + O(2\delta\epsilon_t)] U^{(t)}\}} \\ &\leq \frac{2\delta\epsilon_t}{\sigma_k^* \cos \theta_t - 2\delta\epsilon_t}. \end{aligned}$$

According to the assumption,  $\cos \theta_t \geq \frac{1}{\sqrt{5}}$ ,  $2\delta\epsilon_t \leq \frac{1}{2\sqrt{5}} \sigma_k^*$ , therefore

$$\alpha_{t+1} \leq 2\sqrt{5}\epsilon_t / \sigma_k^* = 4\sqrt{5}\delta(\beta_t + \gamma_t) / \sigma_k^*.$$

To derive  $\gamma_{t+1}$ ,

$$\begin{aligned} \gamma_{t+1} &= \|M^* - M^{(t+1)}\|_2 \\ &= \|M^* - (U^{(t+1)} U^{(t+1)\top} (H_1^{(t)} - D(\mathbf{h}_2^{(t)}) + M^{(t)})^\top)\|_2 \\ &= \|M^* - U^{(t+1)} U^{(t+1)\top} (M^* + O(2\delta(\gamma_t + \beta_t)))^\top\|_2 \\ &= \|(I - U^{(t+1)} U^{(t+1)\top}) M^* + U^{(t+1)} U^{(t+1)\top} O(2\delta(\gamma_t + \beta_t))^\top\|_2 \\ &\leq \|(I - U^{(t+1)} U^{(t+1)\top}) M^*\|_2 + O(2\delta(\gamma_t + \beta_t)) \\ &\leq \tan \theta_{t+1} \|M^*\|_2 + 2\delta(\gamma_t + \beta_t) \\ &= \alpha_{t+1} \|M^*\|_2 + 2\delta(\gamma_t + \beta_t). \end{aligned}$$

The recursive inequality of  $\beta_t$  is trivial.

## C Proof of Theorem 4

*Proof.* Denote  $\sigma_1 = \|M\|_2$ . Define random matrix

$$B_i = \mathbf{x}_i \mathbf{x}_i^\top M \mathbf{x}_i \mathbf{x}_i^\top.$$

It is easy to check that

$$EB_i = 2M + \text{tr}(M)I.$$

$$\begin{aligned} \|B_i - EB_i\|_2 &= \|\mathbf{x}_i \mathbf{x}_i^\top M \mathbf{x}_i \mathbf{x}_i^\top - 2M - \text{tr}(M)I\|_2 \\ &\leq \|\mathbf{x}_i \mathbf{x}_i^\top M \mathbf{x}_i \mathbf{x}_i^\top\|_2 + \|2M - \text{tr}(M)I\|_2 \\ &\leq \|\mathbf{x}_i \mathbf{x}_i^\top M \mathbf{x}_i \mathbf{x}_i^\top\|_2 + 2\|M\|_2 + |\text{tr}(M)|. \end{aligned}$$

According to Lemma 5, with a probability at least  $1 - \eta_2$ , for any  $i \in \{1, \dots, n\}$ ,

$$|\mathbf{x}_i^\top M \mathbf{x}_i| \leq |\text{tr}(M)| + 2\|M\|_F \sqrt{2 \log(2n/\eta_2)} \triangleq c_1.$$

Therefore we have, with a probability at least  $(1 - \eta_1)(1 - \eta_2)$ ,

$$\begin{aligned} \|B_i - EB_i\|_2 &\leq \|\mathbf{x}_i\|_2^2 |\mathbf{x}_i^\top M \mathbf{x}_i| + 2\|M\|_2 + |\text{tr}(M)| \\ &\leq 2d \log(2n/\eta_1) |\text{tr}(M)| + 2\|M\|_F \sqrt{2 \log(2n/\eta_2)} + 2\|M\|_2 + |\text{tr}(M)| \\ &\leq Cdk\sigma_1. \end{aligned}$$

Next we need to bound

$$\begin{aligned} \|E(B_i - EB_i)(B_i - EB_i)^\top\|_2 &= \|E(B_i^2) - (EB_i)^2\|_2 \leq \|E(B_i^2)\|_2 + \|EB_i\|_2^2 \\ &\leq \|E(B_i^2)\|_2 + 2|\text{tr}(M)|^2 + 2\|M\|_2^2 \end{aligned}$$

To bound  $\|E(B_i^2)\|_2$ , denote the eigenvalue decomposition of  $M$  as

$$M = U \Lambda U^\top = U \text{diag}(\lambda_1, \lambda_2, \dots, \lambda_k) U^\top$$

Let  $U_\perp$  be the complementary basis matrix of  $U$ . Define random variables  $\mathbf{u}_i \triangleq U^\top \mathbf{x}_i$ ,  $\mathbf{v}_i \triangleq U_\perp^\top \mathbf{x}_i$ . Since  $\mathbf{x}_i$  are standard random Gaussian,  $\mathbf{u}$  and  $\mathbf{v}$  should also be jointly random Gaussian thus independent.

$$\begin{aligned} \|E(B_i^2)\|_2 &= \|E(\mathbf{x}_i \mathbf{x}_i^\top M \mathbf{x}_i \mathbf{x}_i^\top \mathbf{x}_i \mathbf{x}_i^\top M \mathbf{x}_i \mathbf{x}_i^\top)\|_2 \\ &= \|E\left(\begin{bmatrix} \mathbf{u}_i \\ \mathbf{v}_i \end{bmatrix} \mathbf{u}_i^\top \Lambda \mathbf{u}_i (\|\mathbf{u}_i\|_2^2 + \|\mathbf{v}_i\|_2^2) \mathbf{u}_i^\top \Lambda \mathbf{u}_i \begin{bmatrix} \mathbf{u}_i \\ \mathbf{v}_i \end{bmatrix}^\top\right)\|_2 \\ &\leq \|E(\mathbf{u}_i \mathbf{u}_i^\top \Lambda \mathbf{u}_i (\|\mathbf{u}_i\|_2^2 + \|\mathbf{v}_i\|_2^2) \mathbf{u}_i^\top \Lambda \mathbf{u}_i \mathbf{u}_i^\top)\|_2 \\ &\quad + 2\|E(\mathbf{u}_i \mathbf{u}_i^\top \Lambda \mathbf{u}_i (\|\mathbf{u}_i\|_2^2 + \|\mathbf{v}_i\|_2^2) \mathbf{u}_i^\top \Lambda \mathbf{u}_i \mathbf{v}_i^\top)\|_2 \\ &\quad + \|E(\mathbf{v}_i \mathbf{u}_i^\top \Lambda \mathbf{u}_i (\|\mathbf{u}_i\|_2^2 + \|\mathbf{v}_i\|_2^2) \mathbf{u}_i^\top \Lambda \mathbf{u}_i \mathbf{v}_i^\top)\|_2 \\ &\leq \|E(\mathbf{u}_i \mathbf{u}_i^\top \Lambda \mathbf{u}_i \|\mathbf{u}_i\|_2^2 \mathbf{u}_i^\top \Lambda \mathbf{u}_i \mathbf{u}_i^\top)\|_2 + \|E(\mathbf{u}_i \mathbf{u}_i^\top \Lambda \mathbf{u}_i \|\mathbf{v}_i\|_2^2 \mathbf{u}_i^\top \Lambda \mathbf{u}_i \mathbf{u}_i^\top)\|_2 \\ &\quad + 2\|E(\mathbf{u}_i \mathbf{u}_i^\top \Lambda \mathbf{u}_i \|\mathbf{u}_i\|_2^2 \mathbf{u}_i^\top \Lambda \mathbf{u}_i \mathbf{v}_i^\top)\|_2 + 2\|E(\mathbf{u}_i \mathbf{u}_i^\top \Lambda \mathbf{u}_i \|\mathbf{v}_i\|_2^2 \mathbf{u}_i^\top \Lambda \mathbf{u}_i \mathbf{v}_i^\top)\|_2 \\ &\quad + \|E(\mathbf{v}_i \mathbf{u}_i^\top \Lambda \mathbf{u}_i \|\mathbf{u}_i\|_2^2 \mathbf{u}_i^\top \Lambda \mathbf{u}_i \mathbf{v}_i^\top)\|_2 + \|E(\mathbf{v}_i \mathbf{u}_i^\top \Lambda \mathbf{u}_i \|\mathbf{v}_i\|_2^2 \mathbf{u}_i^\top \Lambda \mathbf{u}_i \mathbf{v}_i^\top)\|_2. \end{aligned}$$

Let us bound the above 6 terms respectively. Recall that with a probability at least  $1 - \eta_2$ ,

$$|\mathbf{u}_i^\top \Lambda \mathbf{u}_i| = |\mathbf{x}_i^\top M \mathbf{x}_i| \leq c_1.$$

With a probability at least  $1 - \eta_3$ , for any  $i \in \{1, \dots, n\}$ ,  $\|\mathbf{u}_i\|_2 \leq 2\sqrt{k \log(4n/\eta_3)}$ ,  $\|\mathbf{v}_i\|_2 \leq 2\sqrt{d \log(4n/\eta_3)}$ . Then:

$$\begin{aligned} &\|E(\mathbf{u}_i \mathbf{u}_i^\top \Lambda \mathbf{u}_i \|\mathbf{u}_i\|_2^2 \mathbf{u}_i^\top \Lambda \mathbf{u}_i \mathbf{u}_i^\top)\|_2 \\ &= \|E\left\{(\mathbf{u}_i^\top \Lambda \mathbf{u}_i)^2 \|\mathbf{u}_i\|_2^2\right\} \mathbf{u}_i \mathbf{u}_i^\top\|_2 \\ &\leq (\mathbf{u}_i^\top \Lambda \mathbf{u}_i)^2 \|\mathbf{u}_i\|_2^4 \\ &\leq 32c_1^2 k^2 \log^2(2n/\eta_3). \end{aligned}$$

$$\begin{aligned}
& \|E(\mathbf{u}_i \mathbf{u}_i^\top \Lambda \mathbf{u}_i \|\mathbf{v}_i\|_2^2 \mathbf{u}_i^\top \Lambda \mathbf{u}_i \mathbf{u}_i^\top)\|_2 \\
&= \|E(\|\mathbf{v}_i\|_2^2)E(\mathbf{u}_i \mathbf{u}_i^\top \Lambda \mathbf{u}_i \mathbf{u}_i^\top \Lambda \mathbf{u}_i \mathbf{u}_i^\top)\|_2 \\
&\leq 4d \log(4n/\eta_3) \|E(\mathbf{u}_i \mathbf{u}_i^\top \Lambda \mathbf{u}_i \mathbf{u}_i^\top \Lambda \mathbf{u}_i \mathbf{u}_i^\top)\|_2 \\
&\leq 4d \log(4n/\eta_3) \|\mathbf{u}_i\|_2^2 (\mathbf{u}_i^\top \Lambda \mathbf{u}_i)^2 \\
&\leq 4d \log(4n/\eta_3) c_1^2 (4k \log(4n/\eta_3)) .
\end{aligned}$$

$$\begin{aligned}
& 2\|E(\mathbf{u}_i \mathbf{u}_i^\top \Lambda \mathbf{u}_i \|\mathbf{u}_i\|_2^2 \mathbf{u}_i^\top \Lambda \mathbf{u}_i \mathbf{v}_i^\top)\|_2 \\
&= 2\|E(\mathbf{u}_i \mathbf{u}_i^\top \Lambda \mathbf{u}_i \|\mathbf{u}_i\|_2^2 \mathbf{u}_i^\top \Lambda \mathbf{u}_i)E(\mathbf{v}_i^\top)\|_2 = 0
\end{aligned}$$

$$\begin{aligned}
& 2\|E(\mathbf{u}_i \mathbf{u}_i^\top \Lambda \mathbf{u}_i \|\mathbf{v}_i\|_2^2 \mathbf{u}_i^\top \Lambda \mathbf{u}_i \mathbf{v}_i^\top)\|_2 \\
&= 2\|E(\mathbf{u}_i (\mathbf{u}_i^\top \Lambda \mathbf{u}_i)^2)E(\|\mathbf{v}_i\|_2^2 \mathbf{v}_i^\top)\|_2 \\
&= 2\|E(\mathbf{u}_i (\mathbf{u}_i^\top \Lambda \mathbf{u}_i)^2)E(\mathbf{v}_i^\top \mathbf{v}_i \mathbf{v}_i^\top)\|_2 = 0
\end{aligned}$$

$$\begin{aligned}
& \|E(\mathbf{v}_i \mathbf{u}_i^\top \Lambda \mathbf{u}_i \|\mathbf{u}_i\|_2^2 \mathbf{u}_i^\top \Lambda \mathbf{u}_i \mathbf{v}_i^\top)\|_2 \\
&= \|E(\mathbf{u}_i^\top \Lambda \mathbf{u}_i \|\mathbf{u}_i\|_2^2 \mathbf{u}_i^\top \Lambda \mathbf{u}_i)E(\mathbf{v}_i \mathbf{v}_i^\top)\|_2 \\
&= \|E(\mathbf{u}_i^\top \Lambda \mathbf{u}_i \|\mathbf{u}_i\|_2^2 \mathbf{u}_i^\top \Lambda \mathbf{u}_i)\|_2 \\
&\leq (\mathbf{u}_i^\top \Lambda \mathbf{u}_i)^2 \|\mathbf{u}_i\|_2^2 \\
&\leq 4c_1^2 k \log(4n/\eta_3) .
\end{aligned}$$

$$\begin{aligned}
& \|E(\mathbf{v}_i \mathbf{u}_i^\top \Lambda \mathbf{u}_i \|\mathbf{v}_i\|_2^2 \mathbf{u}_i^\top \Lambda \mathbf{u}_i \mathbf{v}_i^\top)\|_2 \\
&= \|E\{(\mathbf{u}_i^\top \Lambda \mathbf{u}_i)^2\}E(\mathbf{v}_i \|\mathbf{v}_i\|_2^2 \mathbf{v}_i^\top)\|_2 \\
&= \|E\{(\mathbf{u}_i^\top \Lambda \mathbf{u}_i)^2\}(d+2)I\|_2 \\
&\leq (d+2)(\mathbf{u}_i^\top \Lambda \mathbf{u}_i)^2 \\
&\leq c_1^2 (d+2)
\end{aligned}$$

Add all above together, we have

$$\begin{aligned}
\|E(B_i^2)\|_2 &\leq 32c_1^2 k^2 \log^2(2n/\eta_3) + 4d \log(4n/\eta_3) c_1^2 (4k \log(4n/\eta_3)) \\
&\quad + 4c_1^2 k \log(4n/\eta_3) + c_1^2 (d+2) \\
&\leq Ck^3 d\sigma_1 .
\end{aligned}$$

Apply matrix Bernstein's inequality, the proof is completed.  $\square$

## D Proof of Lemma 13

We assume that  $n \geq Ck^3 d/\delta^2$ .

To prove Eq. (5)

$$\begin{aligned}
& \left\| \frac{1}{2n} \mathcal{A}' \mathcal{A} (M^* - M) - \frac{1}{2} \text{tr}(M_k^* - M) I - (M_k^* - M) \right\|_2 \\
&\leq \left\| \frac{1}{2n} \mathcal{A}' \mathcal{A} (M_k^* - M) - \frac{1}{2} \text{tr}(M_k^* - M) I - (M_k^* - M) \right\|_2 + \left\| \frac{1}{2n} \mathcal{A}' \mathcal{A} (M_\perp^*) \right\|_2 \\
&\leq \left\| \frac{1}{2n} \mathcal{A}' \mathcal{A} (M_\perp^*) \right\|_2 + \delta \|M_k^* - M\|_2 .
\end{aligned}$$

The last inequality is because of Theorem 4. To bound the first term in the last inequality, define random matrix

$$B_i = \mathbf{x}_i \mathbf{x}_i^\top M_\perp^* \mathbf{x}_i \mathbf{x}_i^\top$$

As proved in Theorem 4,  $EB_i = 2M_\perp^* + \text{tr}(M_\perp^*)I$ .

$$\begin{aligned}
\|(B_i - EB_i)\|_2 &= \|\mathbf{x}_i \mathbf{x}_i^\top M_\perp^* \mathbf{x}_i \mathbf{x}_i^\top - 2M_\perp^* + \text{tr}(M_\perp^*)I\|_2 \\
&\leq \|\mathbf{x}_i \mathbf{x}_i^\top M_\perp^* \mathbf{x}_i \mathbf{x}_i^\top\|_2 + 2\|M_\perp^*\|_2 + \|\text{tr}(M_\perp^*)I\|_2 \\
&= \|\mathbf{x}_i \mathbf{x}_i^\top M_\perp^* \mathbf{x}_i \mathbf{x}_i^\top\|_2 + 2\sigma_{k+1}^* + |\text{tr}(M_\perp^*)|
\end{aligned}$$

While

$$\begin{aligned}\|\mathbf{x}_i \mathbf{x}_i^\top M_\perp^* \mathbf{x}_i \mathbf{x}_i^\top\|_2 &\leq \|M_\perp^*\|_2 \|\mathbf{x}_i\|_2^4 \\ &\leq \sigma_{k+1}^* (d + 2\sqrt{2d \log(2n/\eta)})^2 \\ &\leq C d^2 \sigma_{k+1}^*\end{aligned}$$

Applying matrix Bernstein's inequality, with a probability at least  $1 - \eta$ , we have

$$\left\| \frac{1}{n} \sum_{i=1}^n (B_i - \mathbb{E} B_i) \right\|_2 \leq C \sigma_{k+1}^* d^2 / \sqrt{n}.$$

Therefore

$$\left\| \frac{1}{2n} \mathcal{A}' \mathcal{A} (M^* - M) - \frac{1}{2} \text{tr}(M_k^* - M) I - (M_k^* - M) \right\|_2 \leq \delta \|M_k^* - M\|_2 + C \sigma_{k+1}^{*2} d^4 / \sqrt{n}.$$

The other inequalities can be similarly proved.

## E Proof of Lemma 14

First we bound  $\alpha_{t+1}$ . According to assumption, when

$$2(\delta\epsilon_t + r) \leq \frac{\sigma_k^* - \sigma_{k+1}^*}{2\sigma_k^*} \sigma_k^* / \sqrt{5}$$

we have

$$\begin{aligned}\alpha_{t+1} &\leq \frac{\sigma_{k+1}^* \sin \theta_t + 2(\delta\epsilon_t + r)}{\sigma_k^* \cos \theta_t - 2(\delta\epsilon_t + r)} \\ &\leq \frac{2\sigma_k^*}{\sigma_k^* + \sigma_{k+1}^*} \frac{\sigma_{k+1}^* \sin \theta_t + 2(\delta\epsilon_t + r)}{\sigma_k^* \cos \theta_t} \\ &\leq \frac{2\sigma_{k+1}^*}{\sigma_k^* + \sigma_{k+1}^*} \tan \theta_t + \frac{2}{\sigma_k^* + \sigma_{k+1}^*} \frac{2(\delta\epsilon_t + r)}{\cos \theta_t} \\ &\leq \frac{2\sigma_{k+1}^*}{\sigma_k^* + \sigma_{k+1}^*} \tan \theta_t + \frac{4\sqrt{5}}{\sigma_k^* + \sigma_{k+1}^*} (\delta\epsilon_t + r) \\ &\leq \rho \alpha_t + \frac{4\sqrt{5}}{\sigma_k^* + \sigma_{k+1}^*} \delta\epsilon_t + \frac{4\sqrt{5}}{\sigma_k^* + \sigma_{k+1}^*} r.\end{aligned}$$

To bound  $\beta_{t+1}$ . Clearly  $\beta_{t+1} \leq \delta\epsilon_t + r$ .

To bound  $\gamma_{t+1}$ , following the noise-free case,

$$\gamma_{t+1} \leq \alpha_{t+1} \|M^*\|_2 + 2\delta\epsilon_t + 2r.$$

## F Proof of Lemma 15

Abbreviate

$$c = \frac{4\sqrt{5}}{\sigma_k^* + \sigma_{k+1}^*}$$

Then

$$\alpha_{t+1} \leq \rho \alpha_t + c \delta\epsilon_t + cr.$$

According to Lemma 14,

$$\begin{aligned}\beta_{t+1} + \gamma_{t+1} &\leq \delta\epsilon_t + r + \alpha_{t+1} \|M^*\|_2 + 2\delta\epsilon_t + 2r \\ &= \sigma_1^* \alpha_{t+1} + 3\delta\epsilon_t + 3r \\ &\leq \sigma_1^* (\rho \alpha_t + c \delta\epsilon_t + cr) + 3\delta\epsilon_t + 3r \\ &= \rho \sigma_1^* \alpha_t + (\sigma_1^* c + 3) \delta\epsilon_t + (\sigma_1^* c + 3) r\end{aligned}$$

Therefore, abbreviate  $b \triangleq (\sigma_1^* c + 3)$ ,

$$\begin{cases} \alpha_{t+1} \leq \rho \alpha_t + c \delta\epsilon_t + cr \\ \epsilon_{t+1} \leq \rho \sigma_1^* \alpha_t + b \delta\epsilon_t + br \end{cases}$$

define

$$f_t = \alpha_t + 2c\delta\epsilon_t$$

$$\begin{aligned} f_{t+1} &= a_{t+1} + 2c\delta\epsilon_{t+1} \\ &\leq \rho\alpha_t + c\delta\epsilon_t + cr + 2c\delta(\rho\sigma_1^*\alpha_t + b\delta\epsilon_t + br) \\ &= \rho\alpha_t + c\delta\epsilon_t + cr + 2c\delta\rho\sigma_1^*\alpha_t + 2c\delta b\delta\epsilon_t + 2c\delta br \\ &= (\rho + 2c\delta\rho\sigma_1^*)\alpha_t + (c + 2c\delta b)\delta\epsilon_t + (1 + 2\delta b)cr \end{aligned}$$

When

$$\begin{aligned} \delta &\leq \frac{1 - \rho}{4\rho\sigma_1^*c} \\ \Rightarrow \rho + 2c\delta\rho\sigma_1^* &\leq \frac{1 + \rho}{2} \end{aligned}$$

And when

$$\begin{aligned} \Rightarrow \delta &\leq \frac{\rho}{2b} \\ \Rightarrow 2\delta b &\leq \rho \\ \Rightarrow 2c\delta b &\leq \rho c \\ \Rightarrow c + 2c\delta b &\leq (1 + \rho)c \\ \Rightarrow c + 2c\delta b &\leq \frac{1 + \rho}{2} 2c \end{aligned}$$

Then abbreviate  $R \triangleq (c + 2c\delta b)\delta\epsilon_t + (1 + 2\delta b)cr$  we have

$$f_{t+1} \leq \frac{1 + \rho}{2} f_t + (1 + 2\delta b)cr \leq \frac{1 + \rho}{2} f_t + (1 + \rho)cr$$

Abbreviate  $q = (1 + \rho)/2$ ,

$$f_t \leq \frac{(1 + \rho)cr}{1 - q} + q^t(f_0 - \frac{(1 + \rho)cr}{1 - q})$$

To ensure  $\alpha_{t+1} \leq 2$ , we require

$$\begin{aligned} f_0 &\leq 2 \\ \Leftrightarrow \alpha_0 + 2c\delta\epsilon_0 &\leq 2 \end{aligned}$$

According to Lemma 12,

$$\alpha_0 \leq \frac{2}{\sigma_k^* - \sigma_{k+1}^*} 2(\delta\epsilon_0 + r) = \frac{4}{\sigma_k^* - \sigma_{k+1}^*} (\delta\epsilon_0 + r)$$

$$\begin{aligned} \alpha_0 + 2c\delta\epsilon_0 &\leq 2 \\ \Leftrightarrow \frac{4}{\sigma_k^* - \sigma_{k+1}^*} (\delta\epsilon_0 + r) + 2c\delta\epsilon_0 &\leq 2 \\ \Leftrightarrow (4 + 2c(\sigma_k^* - \sigma_{k+1}^*))\delta\epsilon_0 + 4r &\leq 2(\sigma_k^* - \sigma_{k+1}^*) \\ \Leftrightarrow (2 + c(\sigma_k^* - \sigma_{k+1}^*))\delta\epsilon_0 + r &\leq (\sigma_k^* - \sigma_{k+1}^*) \end{aligned}$$

In summary,

$$\alpha_t + 2c\delta\epsilon_t \leq q^t(f_0 - \frac{(1 + \rho)cr}{1 - q}) + \frac{(1 + \rho)cr}{1 - q}$$

provided

$$\delta \leq \min\{\frac{1 - \rho}{4\rho\sigma_1^*c}, \frac{\rho}{2b}\}$$

and

$$\begin{aligned} (2 + c(\sigma_k^* - \sigma_{k+1}^*))\delta\epsilon_0 + r &\leq (\sigma_k^* - \sigma_{k+1}^*) \\ 4\sqrt{5}(\delta \max_t \epsilon_t + r) &\leq \sigma_k^* - \sigma_{k+1}^* \end{aligned}$$



To ensure the last inequality,

$$\begin{aligned}\delta \max_t \epsilon_t \leq f_0 &\leq \alpha_0 + 2c\delta\epsilon_0 \leq \frac{4}{\sigma_k^* - \sigma_{k+1}^*}(\delta\epsilon_0 + r) + 2c\delta\epsilon_0 \\ &= \left(\frac{4}{\sigma_k^* - \sigma_{k+1}^*} + 2c\right)\delta\epsilon_0 + \frac{4}{\sigma_k^* - \sigma_{k+1}^*}r\end{aligned}$$

Therefore we need the condition

$$\begin{aligned}4\sqrt{5} \left( \frac{4}{\sigma_k^* - \sigma_{k+1}^*} + 2c \right) \delta\epsilon_0 + 4\sqrt{5} \left( \frac{4}{\sigma_k^* - \sigma_{k+1}^*} + 1 \right) r &\leq \sigma_k^* - \sigma_{k+1}^* \\ \Leftrightarrow 4\sqrt{5} (4 + 2c(\sigma_k^* - \sigma_{k+1}^*)) \delta\epsilon_0 + 4\sqrt{5} (4 + (\sigma_k^* - \sigma_{k+1}^*)) r &\leq (\sigma_k^* - \sigma_{k+1}^*)^2\end{aligned}$$
